# Supplementary material for: Premature Atherosclerotic Cardiovascular Disease: Trends in Incidence, Risk Factors, and Sex‐Related Differences, 2000 to 2016
Source: PubMed Central journal article supplement — J Am Heart Assoc. 2019 Jul 8;8(14):e012178. doi: 10.1161/JAHA.119.012178 (PMC6662126; doi:10.1161/jaha.119.012178), 2019-07-08
Supplement: JAH3-8-e012178-s001.pdf [file JAH3-8-e012178-s001.pdf]

# **SUPPLEMENTAL MATERIAL**

**Table S1. Indications to cardiac catheterisation by year.**

| Year | Indication*             |               |                                         |
|------|-------------------------|---------------|-----------------------------------------|
|      | Acute Coronary Syndrome | Stable Angina | Other Indications combined <sup>†</sup> |
| 2000 | 436 (67.0)              | 185 (28.4)    | 30 (4.6)                                |
| 2001 | 460 (66.8)              | 189 (27.4)    | 40 (5.8)                                |
| 2002 | 477 (66.6)              | 187 (26.1)    | 52 (7.3)                                |
| 2003 | 495 (68.1)              | 173 (23.8)    | 59 (8.1)                                |
| 2004 | 597 (76.6)              | 132 (16.9)    | 50 (6.4)                                |
| 2005 | 575 (73.5)              | 162 (20.7)    | 45 (5.8)                                |
| 2006 | 602 (77.7)              | 140 (18.1)    | 33 (4.3)                                |
| 2007 | 583 (76.3)              | 143 (18.7)    | 38 (5.0)                                |
| 2008 | 571 (76.6)              | 146 (19.6)    | 28 (3.8)                                |
| 2009 | 582 (76.8)              | 137 (18.1)    | 39 (5.2)                                |
| 2010 | 564 (78.6)              | 126 (17.6)    | 28 (3.9)                                |
| 2011 | 580 (75.8)              | 144 (18.8)    | 41 (5.4)                                |
| 2012 | 553 (75.4)              | 144 (19.7)    | 36 (4.9)                                |
| 2013 | 554 (78.1)              | 120 (16.9)    | 35 (4.9)                                |
| 2014 | 590 (79.4)              | 112 (15.1)    | 41 (5.5)                                |
| 2015 | 550 (73.8)              | 132 (17.7)    | 63 (8.5)                                |
| 2016 | 532 (76.2)              | 114 (16.3)    | 52 (7.5)                                |

\* 22 missing; † This includes: cardiomyopathy, congestive heart failure, non-ischemic cardiomyopathy, post-heart transplant workup, pulmonary hypertension, serious arrhythmia, valvular heart disease.
